# Supplementary material
Source: publisher figshare collection journal article supplement (https://frontiersin.figshare.com/ndownloader/files/31363837)
Supplement: Supplementary file 1 [file 31363837]

Supplement 1: Interest surveys

Included in this supplement are two sections of the interest survey:

1. information about the four phases of interest and questions regarding these
2. interest questionnaire with 26 items in 7 subscales (Tromsø Interest Questionnaire – TRIQ)

These are provided in English and Norwegian, for both the self-chosen object of interest (Object-General; ‘X’) and the specified object of interest (Object-Specific; ‘IL’).

Introductory texts and demographic questions from the surveys are not included in this supplement.

Object-General (X)

- [English: Interest phases X](#EngInterestphasesX)
- [English: Questionnaire X](#EngQuestionnaireX)

Object-Specific (information literacy - IL)

- [English: Interest phases IL](#EngIntPhIL)
- [English: Questionnaire IL](#EngQuestionnaireIL)

Selvvalgt interesseobjekt (X)

- [Norsk: Faser av interesse X](#NorskInteressefaser)
- [Norsk: Spørreskjema X](#NorskSpørreundersøkelse)

Spesifisert interesseobjekt (informasjonskompetanse - IL)

- [Norsk: Faser av interesse IL](#NorskIntFaserIL)
- [Norsk: Spørreskjema IL](#NorskSpørreskjemaIL)

Object-General (X)

English: Interest phases X

So many things can interest us, and that interest can take many forms. In this survey, we are interested in learning more about four different kinds of interest that you have or have had. Your first task will involve finding and writing down examples from your life that fit the description of each of these forms.

First read all four descriptions below, and then go back and write in one example for each from your own life that fits all the criteria of the description. Choose an example that you remember and can describe with reasonable ease.

You can fill in the examples in whichever order you like. It is absolutely normal if some of the examples are easier to come up with than others.

When you have an example that you think fits, read through the description one more time in order to be sure that your example fits all the points described. If it doesn't hit on all the points, try to come up with another example. If it does, write briefly what the interest is about. Continue this way until you have written in an an appropriate example for every form of interest.

When you are done writing in all your examples, answer the questions about each. You will then be sent to more questions asking about ONE of the examples you have provided. You will find out which of the four it will be when you are done and say you are ready to move on.

**1 - Triggered situational interest**

This interest of mine is one that I haven't had a particular interest in from before. Nonetheless, something about it catches my attention because it matters to me right then and there. Something about it can feel good in the moment, but that feeling is relatively brief. It's the situations I find myself in that make me notice this interest at all. Otherwise, I might not give it much notice, really. It doesn't mean much to me in my everyday life, even if I sometimes care about it. 

Write down an interest you have that fits this category.

________________________________________________________________

Q1 How well does the interest description fit for your interest in the interest you wrote down?

- 1--Very poorly (1)
- 2 (2)
- 3 (3)
- 4 (5)
- 5 (6)
- 6 -- Very well (7)

Q2 How easy or difficult was it to think of an appropriate example?

- 1 -- Very easy (1)
- 2 (2)
- 3 (3)
- 4 (4)
- 5 (5)
- 6 - Very difficult (6)

**2 - Maintained situational interest**

This interest of mine is one that I knew a little bit about from before. I probably wouldn't have pursued it had I not been in a certain situation (at a particular place, at a certain time and/or with particular people). I notice that engaging with this interest feels good. I can tell that when I do, I often learn new things. As I learn more about it, and/or can do more with it, I come to see how relevant it is for other things I know or do. I also notice that it helps me to have other people or resources around me that support my development of this interest.

Write down an interest you have that fits this category.

________________________________________________________________

Q3 How well does the interest description fit for your interest in the interest you wrote down?

- 1--Very poorly (1)
- 2 (2)
- 3 (3)
- 4 (4)
- 5 (5)
- 6 -- Very well (6)

Q4 How easy or difficult was it to think of an appropriate example?

- 1 -- Very easy (1)
- 2 (2)
- 3 (3)
- 4 (4)
- 5 (5)
- 6 - Very difficult (6)

**3 - Emerging personal interest**

This interest of mine is one that I really get into. I like pursuing it whenever I can. I am curious about it, and I often find myself wondering about ways to learn more about it or get better at using it in my own way. With practice and use, I can tell I am getting better at or with it, too. That feels really good, and I notice that it means something to me. I am no expert with or at it, so I still need help with it now and then. Fortunately, I get support from other people or other sources when needed.

Write down an interest you have that fits this category.

________________________________________________________________

Q5 How well does the interest description fit for your interest in the interest you wrote down?

- 1--Very poorly (1)
- 2 (2)
- 3 (3)
- 4 (4)
- 5 (5)
- 6 -- Very well (6)

Q6 How easy or difficult was it to think of an appropriate example?

- 1 -- Very easy (1)
- 2 (2)
- 3 (3)
- 4 (4)
- 5 (5)
- 6 - Very difficult (6)

**4 - Well-developed personal interest**

This interest of mine is an important part of who I am. I am so interested in it, that I actively pursue developing it -- even when it is hard or challenging. I don't need much help from others. I often figure it out myself with resources I find on my own. Still, I am open for input or feedback from others when I need it. It feels good being competent with this interest. I can tell that people I look up to seem to respect me with this interest of mine. This interest really means a lot to me.

 Write down an interest you have that fits this category.

________________________________________________________________

Q7 How well does the interest description fit for your interest in the interest you wrote down?

- 1--Very poorly (1)
- 2 (2)
- 3 (3)
- 4 (4)
- 5 (5)
- 6 -- Very well (6)

Q8 How easy or difficult was it to think of an appropriate example?

- 1 -- Very easy (1)
- 2 (2)
- 3 (3)
- 4 (4)
- 5 (5)
- 6 - Very difficult (6)

Q9 In which month were you born?

- January, February or March (1 – Skip to Q10)
- April, May or June (2 – Skip to Q11)
- July, August or September (3 – Skip to Q12)
- October, November or December (4 - Skip to Q13)

Q10

For the rest of the questionnaire, answer all your questions in relation to the example you gave for interest form **1 - Triggered situational interest**. Just so you remember, write in a brief summary of what you wrote for that example in the space below. Forever hereafter, that interest will be referred to as **X. Remember that!**

________________________________________________________________

Q11
For the rest of the questionnaire, answer all your questions in relation to the example you gave for interest form **2 - Maintained situational interest**. Just so you remember, write in a brief summary of what you wrote for that example in the space below. Forever hereafter, that interest will be referred to as **X. Remember that!**

________________________________________________________________

Q12
For the rest of the questionnaire, answer all your questions in relation to the example you gave for interest form **3 - Emerging personal interest**. Just so you remember, write in a brief summary of what you wrote for that example in the space below. Forever hereafter, that interest will be referred to as **X. Remember that!**

________________________________________________________________

Q13
For the rest of the questionnaire, answer all your questions in relation to the example you gave for interest form **4 - Well-developed personal interest**. Just so you remember, write in a brief summary of what you wrote for that example in the space below. Forever hereafter, that interest will be referred to as **X. Remember that!**

________________________________________________________________

Object-General (X)

English: Questionnaire X

GENERAL INTEREST – X

Next, you will be asked to answer questions about your interest in X. For each statement, indicate as best you can which answer fits you best.

1. How interested are you in X?

- Not at all-- 1 (1)
- 2 (2)
- 3 (3)
- 4 (4)
- 5 (5)
- 6-- Very (6)

2. How interested are you in being or becoming a person interested in X?

- Not at all -- 1 (1)
- 2 (2)
- 3 (3)
- 4 (4)
- 5 (5)
- 6-- Very (6)

3. I think X is very interesting.

- Not true at all -- 1 (1)
- 2 (2)
- 3 (3)
- 4 (4)
- 5 (5)
- 6 -- Very true (6)

SITUATIONAL INTEREST – X

4. I am dependent upon **others** for maintaining my interest in X.

- Not true at all -- 1 (1)
- 2 (2)
- 3 (3)
- 4 (4)
- 5 (5)
- 6 -- Very true (6)

5. Without **others**, I would lose interest in X.

- Not true at all -- 1 (1)
- 2 (2)
- 3 (3)
- 4 (4)
- 5 (5)
- 6 -- Very true (6)

POSITIVE AFFECT – X

How little or much do you experience these feelings when you think about your interest in X?

|  | Not at all -- 1 (1) | 2 (2) | 3 (3) | 4 (4) | 5 (5) | 6 -- Very much (6) |
| --- | --- | --- | --- | --- | --- | --- |
| 6. Pleasure (feeling good) (1) |  |  |  |  |  |  |
| 7. Happiness (blissful) (2) |  |  |  |  |  |  |
| 8. Interest (curious) (3) |  |  |  |  |  |  |
| 9. Engagement (totally immersed) (4) |  |  |  |  |  |  |

COMPETENCE LEVEL – X

10. I am satisfied with what I know about X.

- Not true at all -- 1 (1)
- 2 (2)
- 3 (3)
- 4 (4)
- 5 (5)
- 6 -- Very true (6)

11. Overall, I feel competent in relation to X.

- Not true at all -- 1 (1)
- 2 (2)
- 3 (3)
- 4 (4)
- 5 (5)
- 6 -- Very true (6)

12. I am satisfied with what I can do with my interest in X.

- Not true at all -- 1 (1)
- 2 (2)
- 3 (3)
- 4 (4)
- 5 (5)
- 6 -- Very true (6)

COMPETENCE ASPIRATIONS – X

13. I want to **learn** more **about** X

- Not true at all -- 1 (1)
- 2 (2)
- 3 (3)
- 4 (4)
- 5 (5)
- 6 -- Very true (6)

14. I want to develop more X-related **skills**.

- Not true at all -- 1 (1)
- 2 (2)
- 3 (3)
- 4 (4)
- 5 (5)
- 6 -- Very true (6)

15. I want to be able to do more with X.

- Not true at all -- 1 (1)
- 2 (2)
- 3 (3)
- 4 (4)
- 5 (5)
- 6 -- Very true (6)

MEANINGFULNESS – X

16. Having an interest in X is very useful for me.

- Not true at all -- 1 (1)
- 2 (2)
- 3 (3)
- 4 (4)
- 5 (5)
- 6 -- Very true (6)

17. I like having an interest in X.

- Not true at all -- 1 (1)
- 2 (2)
- 3 (3)
- 4 (4)
- 5 (5)
- 6 -- Very true (6)

18. I am very interested in getting good at X.

- Not true at all -- 1 (1)
- 2 (2)
- 3 (3)
- 4 (4)
- 5 (5)
- 6 -- Very true (6)

19. My interest in X fits well with values that are important to me.

- Not true at all (1)
- 2 (2)
- 3 (3)
- 4 (4)
- 5 (5)
- 6 -- Very true (6)

20. My interest in X is very important to me.

- Not true at all -- 1 (1)
- 2 (2)
- 3 (3)
- 4 (4)
- 5 (5)
- 6 -- Very true (6)

SELF-REGULATION and ENGAGEMENT – X

21. I take initiative, on my own, to learn what I can about X.

- Not true at all -- 1 (1)
- 2 (2)
- 3 (3)
- 4 (4)
- 5 (5)
- 6 -- Very true (6)

22. I make time to develop my X-related knowledge and skills.

- Not true at all-- 1 (1)
- 2 (2)
- 3 (3)
- 4 (4)
- 5 (5)
- 6 -- Very true (6)

23. I often have questions I wish to find answers to about how to use X well.

- Not true at all -- 1 (1)
- 2 (2)
- 3 (3)
- 4 (4)
- 5 (5)
- 6 -- Very true (6)

24. I hang in there when developing my interest in X -- even when it is difficult or challenging.

- Not true at all -- 1 (1)
- 2 (2)
- 3 (3)
- 4 (4)
- 5 (5)
- 6 -- Very true (6)

25. I often take the initiative to use my interest in X more.

- Not true at all -- 1 (1)
- 2 (2)
- 3 (3)
- 4 (4)
- 5 (5)
- 6 -- Very true (6)

26. I often come up with questions that I want to find answers to related to what I can do with X.

- Not true at all -- 1 (1)
- 2 (2)
- 3 (3)
- 4 (4)
- 5 (5)
- 6 -- Very true (6)

COMMENTS: If you have any other questions or comments, you can write them below.

 ________________________________________________________________

Norsk: Faser av interesse X

Vi kan bli interessert i utallige ting, og interessen vår kan ta mange former. I denne undersøkelsen er vi interessert i å lære mer om fire forskjellige typer interesser som du har eller har hatt. Oppgaven din starter med å finne og beskrive eksempler fra ditt liv som passer til beskrivelsene av hver av disse formene.

Les først alle fire beskrivelsene under, gå så tilbake og skriv inn et eget eksempel fra livet ditt som passer mer eller mindre alle kriteriene for hver beskrivelse. Velg et eksempel du husker og kan beskrive rimelig lett.

Du kan fylle inn eksemplene i hvilken som helst rekkefølge. Det er helt normalt hvis noen eksempler blir kanskje lettere å komme på enn andre.

Når du tror du har et passende eksempel klart, les igjen gjennom beskrivelsen en gang til for å sikre at det treffer på alle punktene. Treffer det ikke på alle punktene, prøv å komme på et annet eksempel. Gjør det det, skriv kort hva interessen handler om. Fortsett slik til du har skrevet inn et godt eksempel på hver form for interesse. 

Når du er ferdig med å skrive inn alle eksemplene og de to oppfølgingsspørsmålene for hver vil du bli sendt videre til flere spørsmål om *ETT* av eksemplene du har skrevet ned. Hvilket av de fire det blir finner du ut når du er ferdig med dine fire eksempler og trykker deg videre når du er klar.  

**1 - Utløst situasjonell interesse**

Jeg har ikke særlig interesse for dette. Likevel har jeg noen ganger blitt oppmerksom på at denne interessen betyr noe for meg. Å ha med den å gjøre kan kjennes godt i øyeblikket, men den gode følelsen varer relativt kort. Det er situasjonene jeg havner i som gjør at jeg kjenner på dette i det hele tatt. Ellers ville jeg kanskje ikke ha tenkt særlig på den. Den betyr egentlig ikke så mye for meg til daglig, selv om jeg av og til bryr meg om den.

Skriv ned en interesse du har som passer i denne kategorien.

________________________________________________________________

Q1 Hvor godt passer denne beskrivelsen for hvor interessert du er i denne saken?

- 1 - Svært dårlig (1)
- 2 (2)
- 3 (3)
- 4 (4)
- 5 (5)
- 6 - Svært godt (6)

Q2 Hvor lett eller vanskelig var det å komme på et passende eksempel?

- 1 - Svært lett (1)
- 2 (2)
- 3 (3)
- 4 (4)
- 5 (5)
- 6 - Svært vanskelig (6)

**2 – Vedlikeholdt situasjonell interesse**

Interessen min for dette henger sammen med noe jeg kunne litt om fra før. Jeg ville sannsynligvis ikke gjort særlig med denne interessen hvis jeg ikke hadde havnet i en viss situasjon (på en bestemt plass, i en viss tid i livet mitt og/eller med visse folk). Jeg merker at jeg liker denne interessen. Jeg ser at når jeg engasjerer meg i den lærer jeg ofte nye ting. Desto mer jeg lærer om hva den betyr eller hvordan jeg kan bruke den på en god måte, desto bedre ser jeg hvordan den er relevant for andre ting jeg kan eller gjør. Jeg merker også at det hjelper meg langt på vei å ha folk eller ressurser rundt meg som støtter min utvikling av denne interessen.

Skriv ned en interesse du har som passer i denne kategorien.

________________________________________________________________

Q3 Hvor godt passer denne beskrivelsen for hvor interessert du er i denne saken?

- 1 - Svært dårlig (1)
- 2 (2)
- 3 (3)
- 4 (4)
- 5 (5)
- 6 - Svært godt (6)

Q4 Hvor lett eller vanskelig var det å komme på et passende eksempel?

- 1 - Svært lett (1)
- 2 (2)
- 3 (3)
- 4 (4)
- 5 (5)
- 6 - Svært vanskelig (6)

**3 - Voksende personlig interesse**

Interessen min for dette er noe jeg engasjerer meg i. Jeg liker å utvikle denne interssen når jeg kan. Jeg er nysgjerrig på den, og jeg tenker ofte på hvordan jeg kan lære mer eller bli bedre på å bruke den på egen hånd. Med trening og bruk blir jeg mye flinkere med den også. Det føles skikkelig godt, og jeg merker at den gir mening for meg. Jeg er ingen ekspert, så jeg trenger fortsatt hjelp med den av og til. Heldigvis får jeg det fra andre folk eller kilder når det trengs.

Skriv ned en interesse du har som passer i denne kategorien.

________________________________________________________________

Q5 Hvor godt passer denne beskrivelsen for hvor interessert du er i denne saken?

- 1 - Svært dårlig (1)
- 2 (2)
- 3 (3)
- 4 (4)
- 5 (5)
- 6 - Svært godt (6)

Q6 Hvor lett eller vanskelig var det å komme på et passende eksempel?

- 1 - Svært lett (1)
- 2 (2)
- 3 (3)
- 4 (4)
- 5 (5)
- 6 - Svært vanselig (6)

**4 - Velutviklet personlig interesse**
Interessen min for dette er en viktig del av hvem jeg er. Jeg er så interessert i dette at jeg jobber aktivt med å utvikle denne interessen -- til og med når det er vanskelig og utfordrende. Jeg trenger ikke særlig hjelp av andre til det. Jeg finner ofte ut av det selv med ressurser jeg finner på egen hånd. Likevel er jeg åpen for innspill eller tilbakemelding fra andre når jeg trenger det. Det kjennes veldig godt å bli god på denne interessen. Jeg merker også at folk jeg ser opp til i livet mitt respekterer meg for denne interessen min. Denne interessen betyr veldig mye for meg. 
 
Skriv ned en interesse du har som passer i denne kategorien.

________________________________________________________________

Q7 Hvor godt passer denne beskrivelsen for hvor interessert du er i denne saken?

- 1 - Svært dårlig (1)
- 2 (2)
- 3 (3)
- 4 (4)
- 5 (5)
- 6 - Svært godt (6)

Q8 Hvor lett eller vanskelig var det å komme på et passende eksempel?

- 1 - Svært lett (1)
- 2 (2)
- 3 (3)
- 4 (4)
- 5 (5)
- 6 - Svært vanselig (6)

Q9 I hvilken måned har du bursdag?

- januar, februar eller mars (1) (gå til Q10)
- april, mai eller juni (2) (gå til Q11)
- juli, august eller september (3) (gå til Q12)
- oktober, november eller desember (4) (gå til Q13)

Q10
For resten av spørreskjemaet skal du svare på alle spørsmålene i forhold til eksempelet du ga for interesseform **1 - Utløst situasjonell interesse**. For å huske det bedre, ønsker vi at du i feltet nedenfor skriver inn eksempelet du tidligere kom opp med. For resten av spørreskjemaet vil denne interessen bli referert til som X. Husk det!

________________________________________________________________

Q11
For resten av spørreskjemaet skal du svare på alle spørsmålene i forhold til eksempelet du ga for interesseform **2 - Vedlikeholdt situasjonell interesse**. For å huske det bedre, ønsker vi at du i feltet nedenfor skriver inn eksempelet du tidligere kom opp med. For resten av spørreskjemaet vil denne interessen bli referert til som X. Husk det!

________________________________________________________________

Q12
For resten av spørreskjemaet skal du svare på alle spørsmålene i forhold til eksempelet du ga for interesseform **3 - Voksende personlig interesse**. For å huske det bedre, ønsker vi at du i feltet nedenfor skriver inn eksempelet du tidligere kom opp med. For resten av spørreskjemaet vil denne interessen bli referert til som X. Husk det!

________________________________________________________________

Q13
For resten av spørreskjemaet skal du svare på alle spørsmålene i forhold til eksempelet du ga for interesseform **4 - Velutviklet personlig interesse**. For å huske det bedre, ønsker vi at du i feltet nedenfor skriver inn eksempelet du tidligere kom opp med. For resten av spørreskjemaet vil denne interessen bli referert til som X. Husk det!

________________________________________________________________

Norsk: Spørreskjema X

GENERELL INTERESSE – X

1. Hvor interessert er du i X?

- Ikke i det hele tatt -- 1 (1)
- 2 (2)
- 3 (3)
- 4 (4)
- 5 (5)
- 6-- Veldig (6)

2. Hvor interessert er du i å være eller bli en person interessert i X?

- Ikke i det hele tatt -- 1 (1)
- 2 (2)
- 3 (3)
- 4 (4)
- 5 (5)
- 6-- Veldig (6)

3. Jeg syns X er veldig interessant.

- Ikke sant i det hele tatt -- 1 (1)
- 2 (2)
- 3 (3)
- 4 (4)
- 5 (5)
- 6 -- Veldig sant (6)

SITUASJONELL INTERESSE – X

4. Jeg er avhengig av **andre** for å opprettholde interessen min for X.

- Ikke sant i det hele tatt -- 1 (1)
- 2 (2)
- 3 (3)
- 4 (4)
- 5 (5)
- 6 -- Veldig sant (6)

5. Uten **andre** ville jeg miste interesse for X.

- Ikke sant i det hele tatt -- 1 (1)
- 2 (2)
- 3 (3)
- 4 (4)
- 5 (5)
- 6 -- Veldig sant (6)

POSITIV AFFEKT – X

Hvor lite eller mye opplever du disse følelsene i forbindelse med X?

|  | Ikke i det hele tatt -- 1 (1) | 2 (2) | 3 (3) | 4 (4) | 5 (5) | 6 -- Veldig mye (6) |
| --- | --- | --- | --- | --- | --- | --- |
| 6. Velbehag (har det godt) (1) |  |  |  |  |  |  |
| 7. Lykke (er sprudlende glad) (2) |  |  |  |  |  |  |
| 8. Interesse (er nysgjerrig) (3) |  |  |  |  |  |  |
| 9. Engasjement (er helt oppslukt) (4) |  |  |  |  |  |  |

KOMPETANSENIVÅ – X

10. Jeg er fornøyd med hva jeg kan om X.

- Ikke sant i det hele tatt -- 1 (1)
- 2 (2)
- 3 (3)
- 4 (4)
- 5 (5)
- 6 -- Veldig sant (6)

11. Alt i alt føler jeg meg som en person som behersker X.

- Ikke sant i det hele tatt -- 1 (1)
- 2 (2)
- 3 (3)
- 4 (4)
- 5 (5)
- 6 -- Veldig sant (6)

12. Jeg er fornøyd med hva jeg får gjort med interessen min for X.

- Ikke sant i det hele tatt -- 1 (1)
- 2 (2)
- 3 (3)
- 4 (4)
- 5 (5)
- 6 -- Veldig sant (6)

KOMPETANSEMÅL – X

13. Jeg villære mer om X.

- Ikke sant i det hele tatt -- 1 (1)
- 2 (2)
- 3 (3)
- 4 (4)
- 5 (5)
- 6 -- Veldig sant (6)

14. Jeg ønsker å utivkle flere X-relevante ferdigheter.

- Ikke sant i det hele tatt -- 1 (1)
- 2 (2)
- 3 (3)
- 4 (4)
- 5 (5)
- 6 -- Veldig sant (6)

15. Jeg ønsker å kunne gjøre mer med X.

- Ikke sant i det hele tatt -- 1 (1)
- 2 (2)
- 3 (3)
- 4 (4)
- 5 (5)
- 6 -- Veldig sant (6)

MENINGSFULLHET – X

16. Å ha interesse for X er veldig nyttig for meg.

- Ikke sant i det hele tatt -- 1 (1)
- 2 (2)
- 3 (3)
- 4 (4)
- 5 (5)
- 6 -- Veldig sant (6)

17. Jeg liker å ha interesse for X.

- Ikke sant i det hele tatt -- 1 (1)
- 2 (2)
- 3 (3)
- 4 (4)
- 5 (5)
- 6 -- Veldig sant (6)

18. Jeg er veldig interessert i å beherske X.

- Ikke sant i det hele tatt -- 1 (1)
- 2 (2)
- 3 (3)
- 4 (4)
- 5 (5)
- 6 -- veldig sant (6)

19. Interessen min for X passer fint sammen med verdier som er viktige for meg.

- Ikke sant i det hele tatt -- 1 (1)
- 2 (2)
- 3 (3)
- 4 (4)
- 5 (5)
- 6 -- veldig sant (6)

20. Interessen min for X er veldig viktig for meg.

- Ikke sant i det hele tatt -- 1 (1)
- 2 (2)
- 3 (3)
- 4 (4)
- 5 (5)
- 6 -- Veldig sant (6)

SELVSTYRING OG ENGASJEMENT – X

21. Jeg tar selv initiativ til å lære det jeg kan om X.

- Ikke sant i det hele tatt -- 1 (1)
- 2 (2)
- 3 (3)
- 4 (4)
- 5 (5)
- 6 -- Veldig sant (6)

22. Jeg setter av tid til å utvikle mine X-relevante kunnskaper og ferdigheter.

- Ikke sant i det hele tatt -- 1 (1)
- 2 (2)
- 3 (3)
- 4 (4)
- 5 (5)
- 6 -- Veldig sant (6)

23. Jeg har ofte spørsmål som jeg ønsker å finne svar på om hvordan å bruke X godt.

- Ikke sant i det hele tatt -- 1 (1)
- 2 (2)
- 3 (3)
- 4 (4)
- 5 (5)
- 6 -- Veldig sant (6)

24. Jeg står på med å utvikle interessen min for X -- til og med når det er vanskelig eller utfordrende.

- Ikke sant i det hele tatt -- 1 (1)
- 2 (2)
- 3 (3)
- 4 (4)
- 5 (5)
- 6 -- Veldig sant (6)

25. Jeg tar ofte initiativ til å bruke interessen min i X mer.

- Ikke sant i det hele tatt -- 1 (1)
- 2 (2)
- 3 (3)
- 4 (4)
- 5 (5)
- 6 -- Veldig sant (6)

26. Jeg kommer ofte på spørsmål som jeg har lyst til å finne svar på i forhold til det jeg kan gjøre med X.

- Ikke sant i det hele tatt -- 1 (1)
- 2 (2)
- 3 (3)
- 4 (4)
- 5 (5)
- 6 -- Veldig sant (6)

Kommentarer

Hvis du ellers har noen spørsmål eller kommentarer kan det skrives i feltet nedenfor.

________________________________________________________________

Object-Specific (IL)

English: Interest phases IL

**INTEREST AND INFORMATION** **– First round**

We get into doing things that interest us, though what interests us and how much time we spend on our interests may vary widely from person to person and interest to interest. In this study, we want to learn more about what kind of interest you have in **being or becoming an information literate person** and how you experience that.

Before you start telling us, though, we have to clarify what we mean first.

By **information**, we mean all information that you meet in your studies and/or everyday life that can have value for how you understand fields of study, and/or life and the world around you.
  
By **information literate person** we mean a person who actively manages to find, evaluate and use information relevant for their goals. For you, that means being able to:

- Know when you need information
- Find (and get a hold of) information you need when you need it.
- Evaluate information to determine if it is good enough for your purposes
- Use the information in an effective and ethically sound way.

INTEREST DESCRIPTIONS for Information Literacy

With the above definitions in mind, carefully read the four following interest descriptions. After you have a good understanding of all four, answer the question under each.

**1- Triggered Situational Interest**
I don’t have much interest in being or becoming an information literate person. Nonetheless, something about it catches my attention because it matters to me then and there. Being an information literate person can feel good in the moment, but that feeling is relatively brief. I only feel this in certain situations. Otherwise, I might not give much notice to my competence as a user of information. It doesn’t really mean much to me in my everyday life, even if I sometimes care about being or becoming an information literate person.

Q1 How well does this description fit for how interested you are in being or becoming a more information literate person?

- Very poorly -- 1 (1)
- 2 (2)
- 3 (3)
- 4 (4)
- 5 (5)
- 6 -- Very well (6)

**2 – Maintained Situational Interest**
My interest in being or becoming a more information literate person is related to something I knew a little about from before. I probably wouldn’t have pursued this interest had I not been in a certain situation (at a particular place, at a certain time, and/or with particular people). I notice that being or becoming a more information literate person feels good. I can tell that when I do, I often learn new things. As I learn more about what it means to be information literate and/or how to use information in a good way, I see more how this is relevant for other things I know or do. I also notice also that it helps me to have people or resources around me that support my development as an information literate person.

Q2 How well does this description fit for how interested you are in being or becoming a more information literate person?

- Very poorly -- 1 (1)
- 2 (2)
- 3 (3)
- 4 (4)
- 5 (5)
- 6 -- Very well (6)

**3 - Emerging Personal Interest**
My interest in being or becoming a more information literate person is something I really get into. I like further developing my information literacy knowledge and skills whenever I can. I am curious about them and I often find myself wondering about ways to learn more about them or become better at using information-relevant knowledge and skills in my own way. With practice and use, I can tell I am getting better at this, too. That feels really good, and I notice that it means something to me. I am no expert, so I still need help with this every now and then. Fortunately, I get support from other people or resources when needed.

Q3 How well does this description fit for how interested you are in being or becoming a more information literate person?

- Very poorly -- 1 (1)
- 2 (2)
- 3 (3)
- 4 (4)
- 5 (5)
- 6 -- Very well (6)

**4 - Well-Developed Personal Interest**
My interest in being or becoming a more information literate person is an important part of who I am. I am so interested in it that I work actively to pursue developing my knowledge and skills in this area – even when it is hard or challenging. I don’t need much help from others. I often figure it out myself with resources I find on my own. Still, I am open for input or feedback from others when I need it. It feels good being competent as an information literate person. I can tell that people I look up to in my life respect me for this interest of mine. Being or becoming an information literate person means a lot to me.

Q4 How well does this description fit for how interested you are in being or becoming a more information literate person?

- Very poorly -- 1 (1)
- 2 (2)
- 3 (3)
- 4 (4)
- 5 (5)
- 6 -- Very well (6)

After you have answered how well each description above fits for you, go on to the next question.

Q5 Which of these four descriptions do you think best describes your interest in being or becoming an information literate person? It doesn’t have to fit you exactly, but be the best of the four descriptions provided.

- I am not interested in being an information literate person. (6)
- Interest description 1 (7)
- Interest description 2 (8)
- Interest description 3 (9)
- Interest description 4 (10)

Object-Specific (IL)

**English: Questionnaire IL**

GENERAL INTEREST - IL

For these questions, you will be asked to answer questions about how you experience being an information literate person. For each statement, choose the answer that you believe describes you best.

1. How interested are you in **being** an information literate person?

- Not at all -- 1 (1)
- 2 (2)
- 3 (3)
- 4 (4)
- 5 (5)
- 6-- Very much (6)

2. How interested are you in **becoming** an information literate person?

- Not at all -- 1 (1)
- 2 (2)
- 3 (3)
- 4 (4)
- 5 (5)
- 6-- Very much (6)

3. I think information literacy is very interesting.

- Not true at all -- 1 (1)
- 2 (2)
- 3 (3)
- 4 (4)
- 5 (5)
- 6 -- Very true (6)

SITUATIONAL INTEREST – IL

4. I am dependent upon **others** for maintaining my interest in being or becoming an information literate person.

- Not true at all -- 1 (1)
- 2 (2)
- 3 (3)
- 4 (4)
- 5 (5)
- 6 -- Very true (6)

5. Without **others**, I would lose interest in being or becoming an information literate person.

- Not true at all -- 1 (1)
- 2 (2)
- 3 (3)
- 4 (4)
- 5 (5)
- 6 -- Very true (6)

POSITIVE AFFECT - IL

How little or much do you experience these feelings in relation to being or becoming an information literate person?

|  | Not at all - 1 (1) | 2 (2) | 3 (3) | 4 (4) | 5 (5) | 6 - Very much (6) |
| --- | --- | --- | --- | --- | --- | --- |
| 6. Pleasure (feeling good) (1) |  |  |  |  |  |  |
| 7. Happiness (blissful) (2) |  |  |  |  |  |  |
| 8. Interest (curious) (3) |  |  |  |  |  |  |
| 9. Engagement (totally immersed) (4) |  |  |  |  |  |  |

COMPETENCE LEVEL – IL

10. I am satisfied with my information literacy abilities.

- Not true at all -- 1 (1)
- 2 (2)
- 3 (3)
- 4 (4)
- 5 (5)
- 6 -- Very true (6)

11. Overall I feel I am an information literate person.

- Not true at all -- 1 (1)
- 2 (2)
- 3 (3)
- 4 (4)
- 5 (5)
- 6 -- Very true (6)

12. I am satisfied with what I accomplish with my level of information literacy.

- Not true at all -- 1 (1)
- 2 (2)
- 3 (3)
- 4 (4)
- 5 (5)
- 6 -- Very true (6)

COMPETENCE ASPIRATIONS – IL

13. I want to **learn** **more about** information literacy.

- Not true at all -- 1 (1)
- 2 (2)
- 3 (3)
- 4 (4)
- 5 (5)
- 6 -- Very true (6)

14. I want to develop more information literacy skills.

- Not true at all -- 1 (1)
- 2 (2)
- 3 (3)
- 4 (4)
- 5 (5)
- 6 -- Very true (6)

15. I wish I could do more with information literacy.

- Not true at all -- 1 (1)
- 2 (2)
- 3 (3)
- 4 (4)
- 5 (5)
- 6 -- Very true (6)

MEANINGFULNESS – IL

16. To be an information literate person is very useful for me.

- Not true at all -- 1 (1)
- 2 (2)
- 3 (3)
- 4 (4)
- 5 (5)
- 6 -- Very true (6)

17. I like being an information literate person.

- Not true at all -- 1 (1)
- 2 (2)
- 3 (3)
- 4 (4)
- 5 (5)
- 6 -- Very true (6)

18. I am very interested in being or becoming an information literate person.

- Not true at all -- 1 (1)
- 2 (2)
- 3 (3)
- 4 (4)
- 5 (5)
- 6 -- Very true (6)

19. Being an information literate person fits with values that are important to me.

- Not true at all -- 1 (1)
- 2 (2)
- 3 (3)
- 4 (4)
- 5 (5)
- 6 -- Very true (6)

20. For me, being or becoming an information literate person is important.

- Not true at all -- 1 (1)
- 2 (2)
- 3 (3)
- 4 (4)
- 5 (5)
- 6 -- Very true (6)

SELF-REGULATION and ENGAGEMENT – IL

21. I take initiative, on my own, to learn what I can in order to be more information literate.

- Not true at all -- 1 (1)
- 2 (2)
- 3 (3)
- 4 (4)
- 5 (5)
- 6 -- Very true (6)

22. I make time to develop my information literacy knowledge and skills.

- Not true at all -- 1 (1)
- 2 (2)
- 3 (3)
- 4 (4)
- 5 (5)
- 6 -- Very true (6)

23. I often have questions I want to find answers to about how to use information well.

- Not true at all -- 1 (1)
- 2 (2)
- 3 (3)
- 4 (4)
- 5 (5)
- 6 -- Very true (6)

24. I hang in there when developing my information literacy – even when it is hard or challenging.

- Not true at all -- 1 (1)
- 2 (2)
- 3 (3)
- 4 (4)
- 5 (5)
- 6 -- Very true (6)

25. I often take the initiative to become more information literate.

- Not true at all -- 1 (1)
- 2 (2)
- 3 (3)
- 4 (4)
- 5 (5)
- 6 -- Very true (6)

26. I often come up with questions that I want to find answers to related to what I **know about** or **can do with** my information literacy.

- Not true at all -- 1 (1)
- 2 (2)
- 3 (3)
- 4 (4)
- 5 (5)
- 6 -- Very true (6)

If you have any other questions or comments, you can write them below.
  
 _______________________________________________________________

Object-Specific (IL)

**Norsk: Faser av interesse – IL**

Vi kan bli interessert i utallige ting, og interessen vår kan ta mange former. I denne undersøkelsen er vi spesielt interessert i å lære mer om hva slags interesse du har for å være eller bli en person som er informasjonskompetent og hvordan du opplever denne interessen. 
  
Før du kan svare må vi få avklart noen definisjoner først.

Med **informasjon** mener vi all informasjon som du møter i studiene, jobben og/eller hverdagen som kan ha verdi for din forståelse av fag, jobb og/eller livet og verden rundt deg.

Som en **informasjonskompetent person** mener vi en person som aktivt klarer å finne, evaluere og bruke informasjon utfra målene sine. For deg innebærer det å kunne:

- Vite når du trenger informasjon.
- Finne (og få tak i) informasjonen du trenger når du trenger det.
- Evaluere informasjonene for å bestemme om den holder mål.
- Bruke informasjon på en effektiv og etisk gjennomtenkt måte.

Les nøye de neste fire interessebeskrivelsene med disse definisjonene i mente.

**Interesse 1**

Jeg har ikke særlig interesse for å være eller bli en informasjonskompetent person. Likevel har jeg noen ganger blitt oppmerksom på at det å kunne bruke informasjon på en god måte betyr noe for meg. Å være en informasjonskompetent person kan kjennes godt i øyeblikket, men den gode følelsen varer relativt kort. Det er situasjonene jeg havner i som gjør at jeg kjenner på dette i det hele tatt. Ellers ville jeg kanskje ikke ha tenkt særlig på min kompetanse som informasjonsbruker. Det betyr egentlig ikke så mye for meg til daglig, selv om jeg av og til bryr meg om å være eller bli en informasjonskompetent person.

Q1 Hvor godt passer denne beskrivelsen for hvor interessert du er i å være eller bli en mer informasjonskompetent person?

- Svært dårlig -- 1 (1)
- 2 (2)
- 3 (3)
- 4 (4)
- 5 (5)
- 6 -- Svært godt (6)

**Interesse 2**

Interessen min for å være eller bli en mer informasjonskompetent person henger sammen med noe jeg visste litt om fra før. Jeg ville sannsynligvis ikke gjort særlig med denne interessen hvis jeg ikke hadde havnet i en viss situasjon (på en bestemt plass, i en viss tid i livet mitt, og/eller med visse folk). Jeg merker at jeg liker å være eller bli en mer informasjonskompetent person. Jeg ser at når jeg engasjerer meg i det lærer jeg ofte nye ting. Desto mer jeg lærer om hva det betyr å være informasjonskompetent og/eller hvordan å bruke informasjon på en god måte, desto bedre ser jeg hvordan dette er relevant for andre ting jeg kan eller gjør. Jeg merker også at det hjelper meg langt på vei å ha folk eller ressurser rundt meg som støtter min utvikling som en informasjonskompetent person.

Q2 Hvor godt passer denne beskrivelsen for hvor interessert du er i å være eller bli en mer informasjonskompetent person?

- Svært dårlig -- 1 (1)
- 2 (2)
- 3 (3)
- 4 (4)
- 5 (5)
- 6 -- Svært godt (6)

**Interesse 3**
Interessen min for å være eller bli en mer informasjonskompetent person er noe jeg engasjerer meg i. Jeg liker å utvikle mine informasjonskompetanse kunnskaper og ferdigheter videre når jeg kan. Jeg er nysgjerrig på dem og tenker ofte på hvordan jeg kan lære mer eller bli bedre på å bruke informasjonsrelevante kunnskaper og ferdigheter på egen hånd. Med trening og bruk blir jeg mye flinkere med dem også. Det føles skikkelig godt og jeg merker at det gir mening for meg. Jeg er ingen ekspert, så jeg trenger fortsatt hjelp med dette av og til. Heldigvis får jeg det fra andre folk eller kilder når det trengs.

Q3 Hvor godt passer denne beskrivelsen for hvor interessert du er i å være eller bli en mer informasjonskompetent person?

- Svært dårlig -- 1 (1)
- 2 (2)
- 3 (3)
- 4 (4)
- 5 (5)
- 6 -- Svært godt (6)

**Interesse 4**

Interessen min for å være eller bli en mer informasjonskompetent person er en viktig del av hvem jeg er. Jeg er så interessert i det at jeg jobber aktivt med å utvikle disse kunnskapene og ferdighetene mine – til og med når det er vanskelig eller utfordrende. Jeg trenger ikke særlig hjelp av andre til det. Jeg finner ofte ut av det selv med ressurser jeg finner på egen hånd. Likevel er jeg åpen for innspill eller tilbakemelding fra andre når jeg trenger det. Det kjennes veldig godt å bli god til dette.  Jeg merker også at folk jeg ser opp til i livet mitt respekterer meg for denne interessen min. Å være eller bli en informasjonskompetent person betyr veldig mye for meg.

Q4 Hvor godt passer denne beskrivelsen for hvor interessert du er i å være eller bli en mer informasjonskompetent person?

- Svært dårlig -- 1 (1)
- 2 (2)
- 3 (3)
- 4 (4)
- 5 (5)
- 6 -- Svært godt (6)

Svar nå på hvor godt hver beskrivelse over passer for deg. Gå så videre til det neste spørsmålet.

Q5 Hvilken av de fire beskrivelsene syns du beskriver best din interesse for å være eller bli en informasjonskompetent person? Den trenger ikke å passe *akkurat,* men best av de fire beskrivelsene gitt.

- Jeg er ikke interessert i å bli en informasjonskompetent person. (6)
- Interessebeskrivelse 1 (7)
- Interessebeskrivelse 2 (8)
- Interessebeskrivelse 3 (9)
- Interessebeskrivelse 4 (10)

Object-Specific (IL)

**Norsk: Spørreskjema – IL**

GENERELL INTERESSE - IL

For disse spørsmålene vil du bli bedt om å svare på spørsmål om hvordan du opplever å være en informasjonskompetent person. For hver påstand, indikér så godt du kan det som stemmer best for deg.

1. Hvor interessert er du i **å være** en informasjonskompetent person?

- Ikke i det hele tatt -- 1 (1)
- 2 (2)
- 3 (3)
- 4 (4)
- 5 (5)
- 6-- Veldig (6)

2. Hvor interessert er du i **å bli** en informasjonskompetent person?

- Ikke i det hele tatt -- 1 (1)
- 2 (2)
- 3 (3)
- 4 (4)
- 5 (5)
- 6-- Veldig (6)

3. Jeg syns informasjonskompetanse er veldig interessant.

- Ikke sant i det hele tatt -- 1 (1)
- 2 (2)
- 3 (3)
- 4 (4)
- 5 (5)
- 6 -- Veldig sant (6)

SITUASJONELL INTERESSE – IL

4. Jeg er avhengig av **andre** for å opprettholde interessen for å være eller bli en informasjonskompetent person.

- Ikke sant i det hele tatt -- 1 (1)
- 2 (2)
- 3 (3)
- 4 (4)
- 5 (5)
- 6 -- Veldig sant (6)

5. Uten **andre** ville jeg miste interesse for å være eller bli en informasjonskompetent person.

- Ikke sant i det hele tatt -- 1 (1)
- 2 (2)
- 3 (3)
- 4 (4)
- 5 (5)
- 6 -- Veldig sant (6)

POSITIV AFFEKT – IL

Hvor lite eller mye opplever du disse følelsene i forbindelse med å være eller bli en informasjonskompetent person?

|  | Ikke i det hele tatt -- 1 (1) | 2 (2) | 3 (3) | 4 (4) | 5 (5) | 6 -- Veldig mye (6) |
| --- | --- | --- | --- | --- | --- | --- |
| 6. Velbehag (har det godt) (1) |  |  |  |  |  |  |
| 7. Lykke (er sprudlende glad) (2) |  |  |  |  |  |  |
| 8. Interesse (er nysgjerrig) (3) |  |  |  |  |  |  |
| 9. Engasjement (er helt oppslukt) (4) |  |  |  |  |  |  |

KOMPETANSENIVÅ – IL

10. Jeg er fornøyd med hva jeg kan om informasjonskompetanse.

- Ikke sant i det hele tatt -- 1 (1)
- 2 (2)
- 3 (3)
- 4 (4)
- 5 (5)
- 6 -- Veldig sant (6)

11. Alt i alt føler jeg meg som en informasjonskompetent person.

- Ikke sant i det hele tatt -- 1 (1)
- 2 (2)
- 3 (3)
- 4 (4)
- 5 (5)
- 6 -- Veldig sant (6)

12. Jeg er fornøyd med hva jeg får gjort med informasjonskompetansen min.

- Ikke sant i det hele tatt -- 1 (1)
- 2 (2)
- 3 (3)
- 4 (4)
- 5 (5)
- 6 -- Veldig sant (6)

KOMPETANSEMÅL for IL

13. Jeg vil **lære** mer om informasjonskompetanse.

- Ikke sant i det hele tatt -- 1 (1)
- 2 (2)
- 3 (3)
- 4 (4)
- 5 (5)
- 6 -- Veldig sant (6)

14. Jeg ønsker å utvikle flere informasjonskompetanse-relevante ferdigheter.

- Ikke sant i det hele tatt -- 1 (1)
- 2 (2)
- 3 (3)
- 4 (4)
- 5 (5)
- 6 -- Veldig sant (6)

15. Jeg ønsker å kunne gjøre mer med informasjonskompetanse.

- Ikke sant i det hele tatt -- 1 (1)
- 2 (2)
- 3 (3)
- 4 (4)
- 5 (5)
- 6 -- Veldig sant (6)

MENINGSFULLHET – IL

16. Å være en informasjonskompetent person er veldig nyttig for meg.

- Ikke sant i det hele tatt -- 1 (1)
- 2 (2)
- 3 (3)
- 4 (4)
- 5 (5)
- 6 -- Veldig sant (6)

17. Jeg liker å være en informasjonskompetent person.

- Ikke sant i det hele tatt -- 1 (1)
- 2 (2)
- 3 (3)
- 4 (4)
- 5 (5)
- 6 -- Veldig sant (6)

18. Jeg er veldig interessert i åvære eller bli en informasjonskompetent person.

- Ikke sant i det hele tatt -- 1 (1)
- 2 (2)
- 3 (3)
- 4 (4)
- 5 (5)
- 6 -- Veldig sant (6)

19. Å være en informasjonskompetent person passer fint sammen med verdier som er viktige for meg.

- Ikke sant i det hele tatt -- 1 (1)
- 2 (2)
- 3 (3)
- 4 (4)
- 5 (5)
- 6 -- Veldig sant (6)

20. For meg er det å være eller bli en informasjonskompetent person veldig viktig.

- Ikke sant i det hele tatt -- 1 (1)
- 2 (2)
- 3 (3)
- 4 (4)
- 5 (5)
- 6 -- Veldig sant (6)

SELVSTYRING OG ENGASJEMENT – IL

21. Jeg tar selv initiativ til å lære det jeg kan for å bli mer informasjonskompetent.

- Ikke sant i det hele tatt -- 1 (1)
- 2 (2)
- 3 (3)
- 4 (4)
- 5 (5)
- 6 -- Veldig sant (6)

22. Jeg setter av tid til å utvikle mine informasjonsrelevante kunnskaper og ferdigheter.

- Ikke sant i det hele tatt -- 1 (1)
- 2 (2)
- 3 (3)
- 4 (4)
- 5 (5)
- 6 -- Veldig sant (6)

23. Jeg har ofte spørsmål som jeg ønsker å finne svar på om hvordan å bruke informasjon godt.

- Ikke sant i det hele tatt -- 1 (1)
- 2 (2)
- 3 (3)
- 4 (4)
- 5 (5)
- 6 -- Veldig sant (6)

24. Jeg står på med å utvikle informasjonskompetansen min -- til og med når det er vanskelig eller utfordrende.

- Ikke sant i det hele tatt -- 1 (1)
- 2 (2)
- 3 (3)
- 4 (4)
- 5 (5)
- 6 -- Veldig sant (6)

25. Jeg tar ofte initiativ selv til å bli mer informasjonskompetent.

- Ikke sant i det hele tatt -- 1 (1)
- 2 (2)
- 3 (3)
- 4 (4)
- 5 (5)
- 6 -- Veldig sant (6)

26. Jeg kommer ofte på spørsmål som jeg har lyst til å finne svar på i forhold til det jeg **kan om**, eller **kan med**, informasjonskompetanse.

- Ikke sant i det hele tatt -- 1 (1)
- 2 (2)
- 3 (3)
- 4 (4)
- 5 (5)
- 6 -- Veldig sant (6)

Hvis du ellers har noen spørsmål eller kommentarer kan det skrives i feltet nedenfor.

________________________________________________________________
